# Supplementary material
Source: PubMed Central journal article supplement (PMC9903857)
Supplement: mmc1.pdf [file mmc1.pdf]

**Cell Genomics, Volume 2**

**Supplemental information**

**Functional inference of gene regulation**

**using single-cell multi-omics**

**Vinay K. Kartha, Fabiana M. Duarte, Yan Hu, Sai Ma, Jennifer G. Chew, Caleb A. Lareau, Andrew Earl, Zach D. Burkett, Andrew S. Kohlway, Ronald Lebofsky, and Jason D. Buenrostro**

# Supplemental Information

## Supplemental Figures

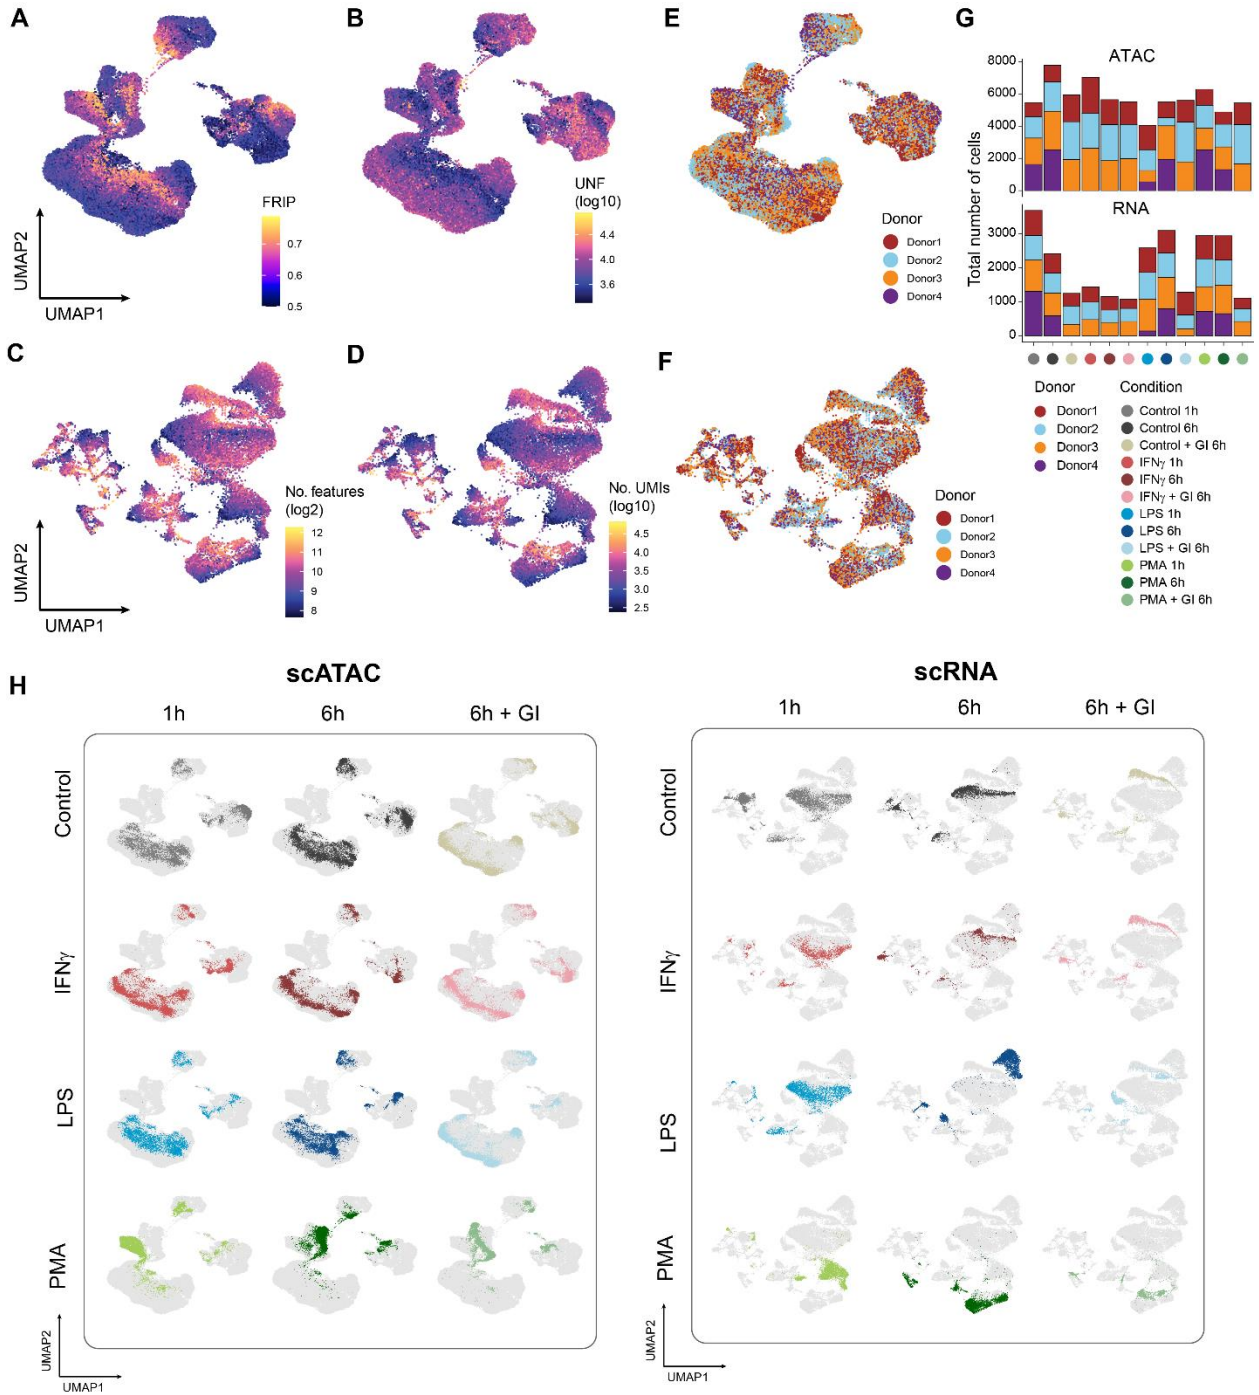

**Figure S1.** Quality metrics associated with scATAC-seq and scRNA-seq profiling of resting and stimulated PBMCs (related to Figure 1). **A-B.** UMAP projection of scATAC-seq cells colored by fraction of reads in peaks (FRIP) (A) or total number of unique nuclear Tn5 insertion fragments (B). **C-D.** UMAP projection of scRNA-seq cells colored by total number of detected features (C) or total number of unique molecular identifiers (UMIs) per feature (D). **E-F.** UMAP projection of scATAC-seq (E) and scRNA-seq (F) stimulation data colored by Donor. **G.** Number of cells passing quality filtering for scATAC-seq and scRNA-seq stimulation data per donor per condition. **H.** UMAP of scATAC-seq (left) and scRNA-seq (right) cells profiled, with cells for each condition highlighted on the background of all cells.

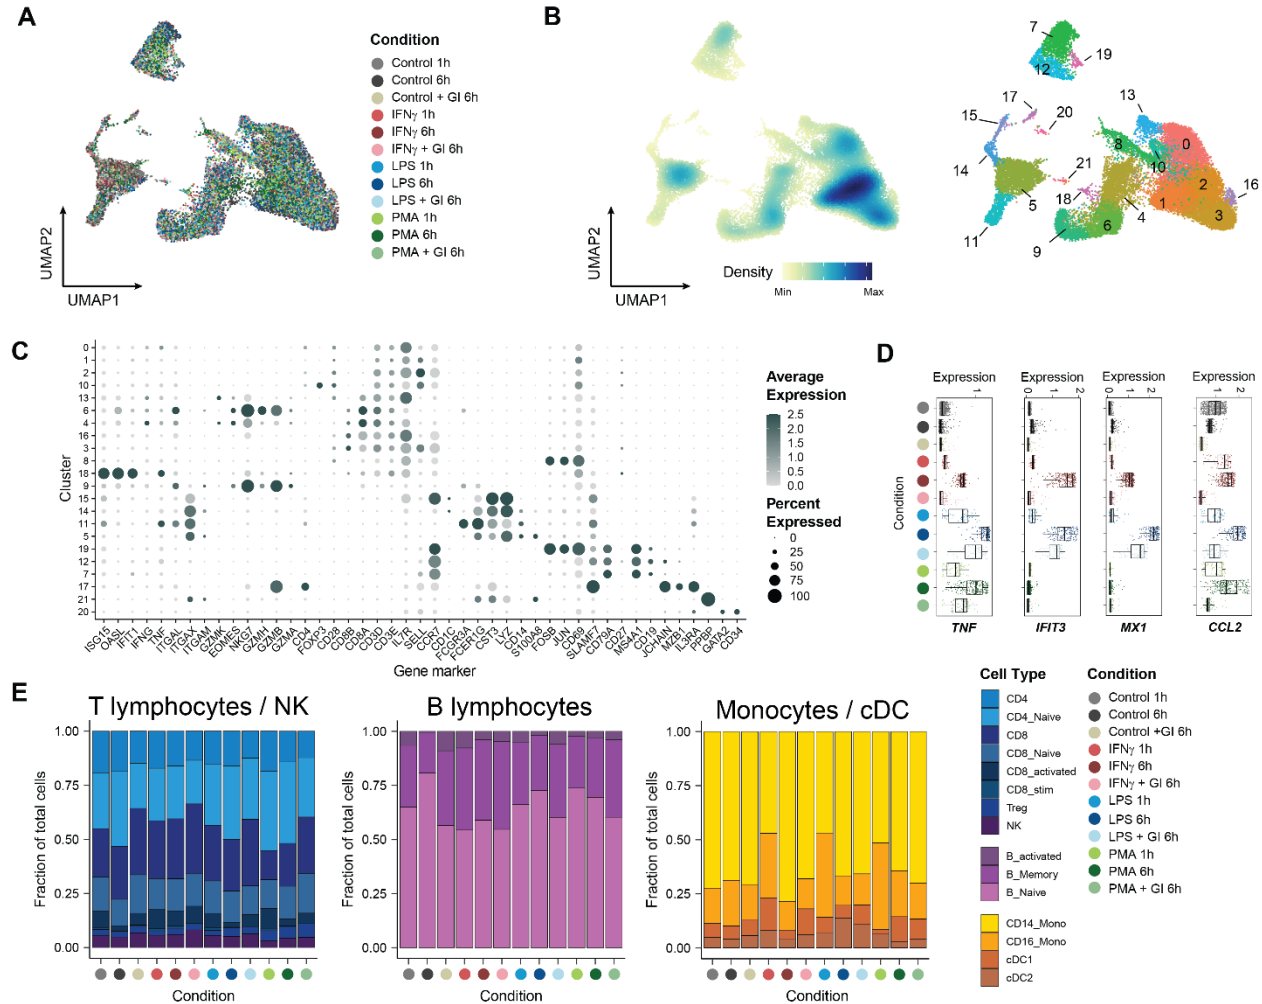

**Figure S2.** Alignment, cell clustering and annotation of scRNA-seq data across stimulation conditions (related to Figure 1). **A.** UMAP of scRNA-seq cells (aligned) after adjusting for treatment condition **B.** UMAP of aligned scRNA-seq cells in A, colored by density (left) or cell cluster based on Leiden clustering (right). **C.** Dotplot of gene expression markers highlighting cluster specific expression (used for scRNA-seq cell annotation) **D.** Smoothed RNA expression distribution in CD14 Monocytes across conditions for specific stimulus response genes **E.** Fraction of total scRNA-seq CD4/CD8/NK cells (left), B lymphocytes (middle) and Monocytes / cDCs (right) grouped per condition and cell type annotation.

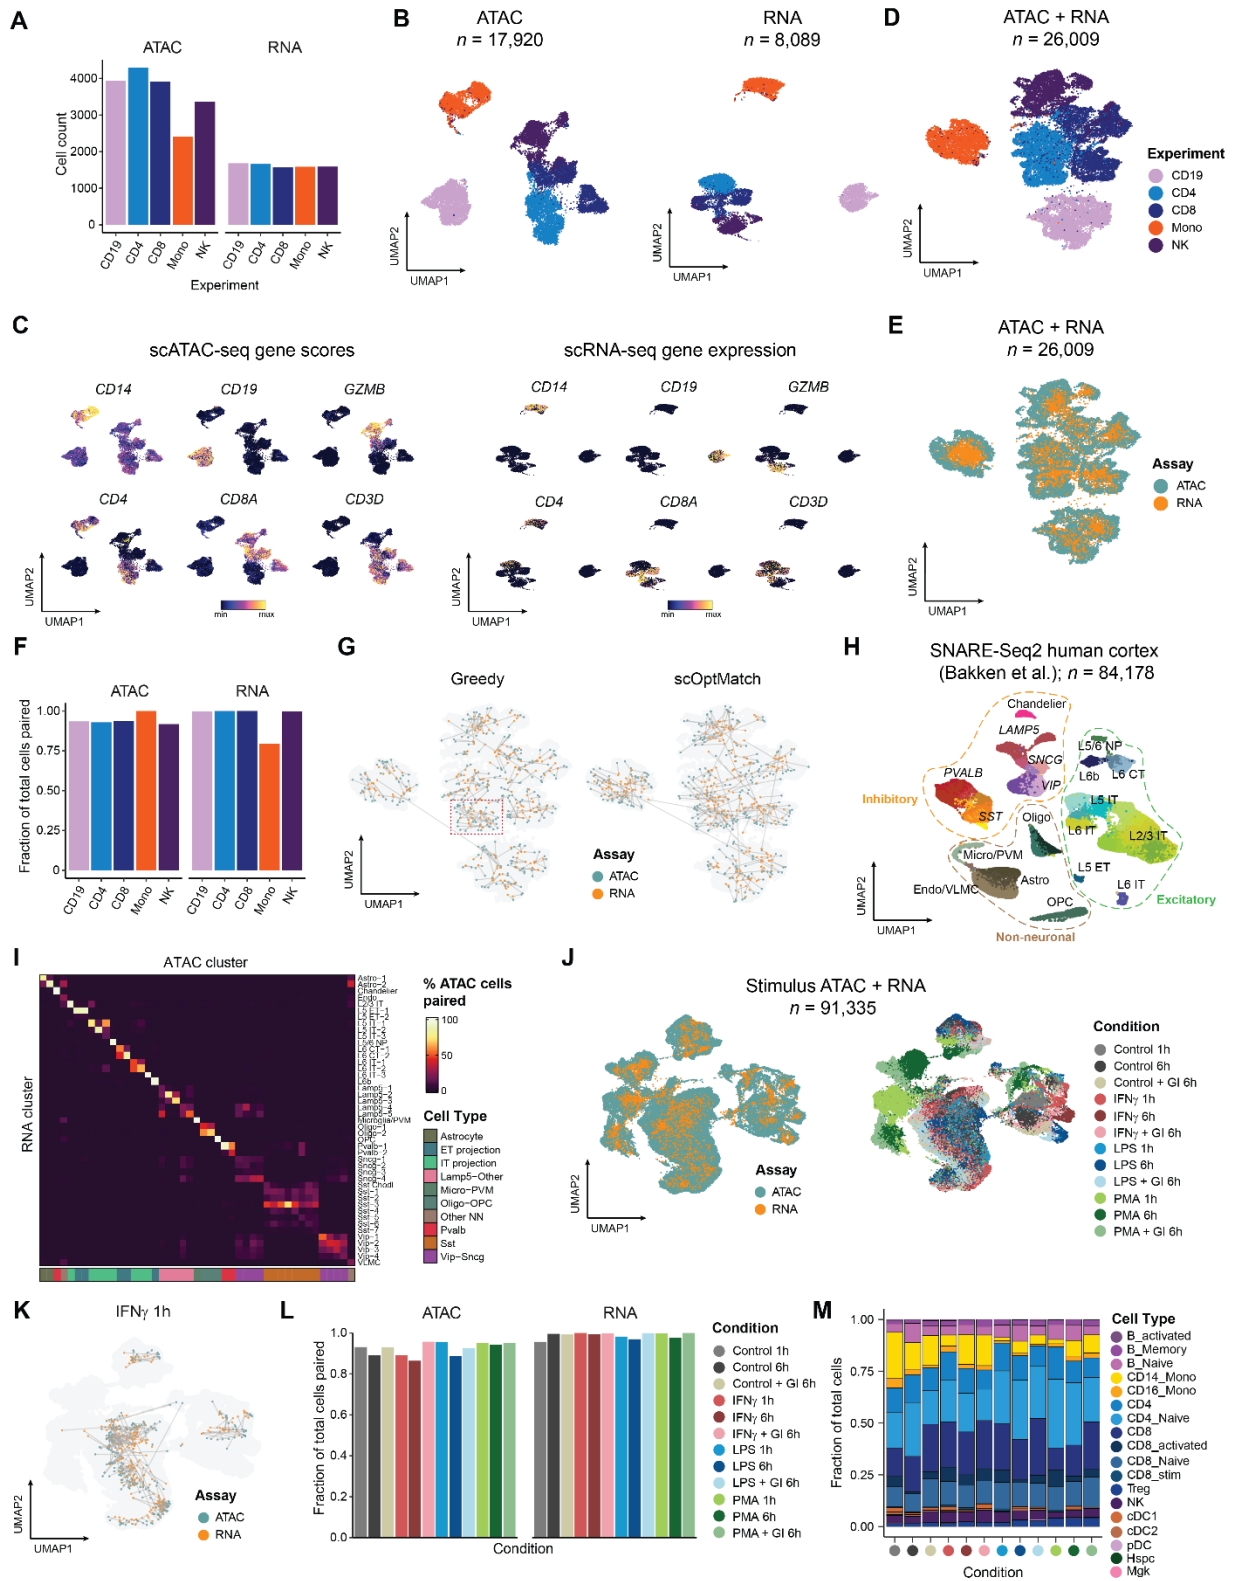

**Figure S3.** Applications of scOptMatch to pair scATAC-seq and scRNA-seq cells from enriched PBMC subtypes, SNARE-Seq2 data from human cortex, and extension to stimulated scATAC-seq and scRNA-seq PBMC data (related to Figure 2). **A.** Total number of cells assayed and

passing QC for scATAC-seq and scRNA-seq from bead enriched cells. **B.** UMAP plots of bead enriched PBMCs showing single cell projections for scATAC (left) or scRNA cells (right), based on peak accessibility or gene expression, respectively. **C.** UMAPs of scATAC or scRNA cells (from B) colored by smoothed gene activity scores or RNA gene expression of cell type marker genes, respectively. **D.** UMAP of both scATAC and scRNA cells based on CCA co-embedding using union of top variable scATAC gene scores and top variable scRNA gene expression, with cells colored by enriched sub-population. **E.** Same as in D, with cells colored by assay. **F.** Fraction of total scATAC and scRNA-seq cells paired using our OptMatch approach per isolate cell type assayed. **G.** CCA-based UMAP of cells from D, highlighting computational pairing (300 pairs shown at random) between scATAC-seq and scRNA-seq cells using a greedy approach (scRNA cell with maximum Pearson  $r$  for each scATAC cell; left) versus our scOptMatch constrained pairing method (right). Red box highlights multiple RNA cells mapping to the same ATAC cell. **H.** UMAP projection of single cells ( $n=84,178$ ) for SNARE-Seq2 human primary cortex data (Bakken et al.) [1], with cells colored by previously established cell type annotations ( $n=43$  clusters). Labels indicate predetermined cell type annotations or gene expression markers (italicized). **I.** Heatmap highlighting scOptMatch pairing accuracy when applied to SNARE-Seq2 human brain multi-modal data ( $n=84,178$  cells; Fig S3H). Percentages indicate percent cells in each ATAC cluster paired with the corresponding RNA cell cluster, using previously annotated clusters to group cells by. Color bar indicates broader cell cluster groupings of neuronal and non-neuronal cell types, as described in Bakken et al. [1]. **J.** UMAP clustering based on CCA co-embedding of stimulation data cells colored by assay (left) or by stimulus condition (right). **K.** Computational pairing (300 pairs shown at random) between scATAC-seq and scRNA-seq cells for the IFN $\gamma$  1h stimulation condition. **L.** Fraction of total scATAC and scRNA-seq cells paired using our OptMatch approach per stimulus condition assayed. **M.** Distribution of scATAC cells ( $n=62,219$ ) based on paired annotation obtained from pairing to scRNA-seq cells, per stimulus condition. CT: Corticothalamic cells; ET: Extratelencephalic cells; IT: Intratelecephalic cells; NP: Near-projecting; OPC: Oligodendrocyte precursors; Oligo: Oligodendrocyte; Micro: Microglia; PVM: Perivascular macrophages; Astro: Astrocytes; Edo: Endothelial cells; VLMC: vascular and leptomeningeal cells.

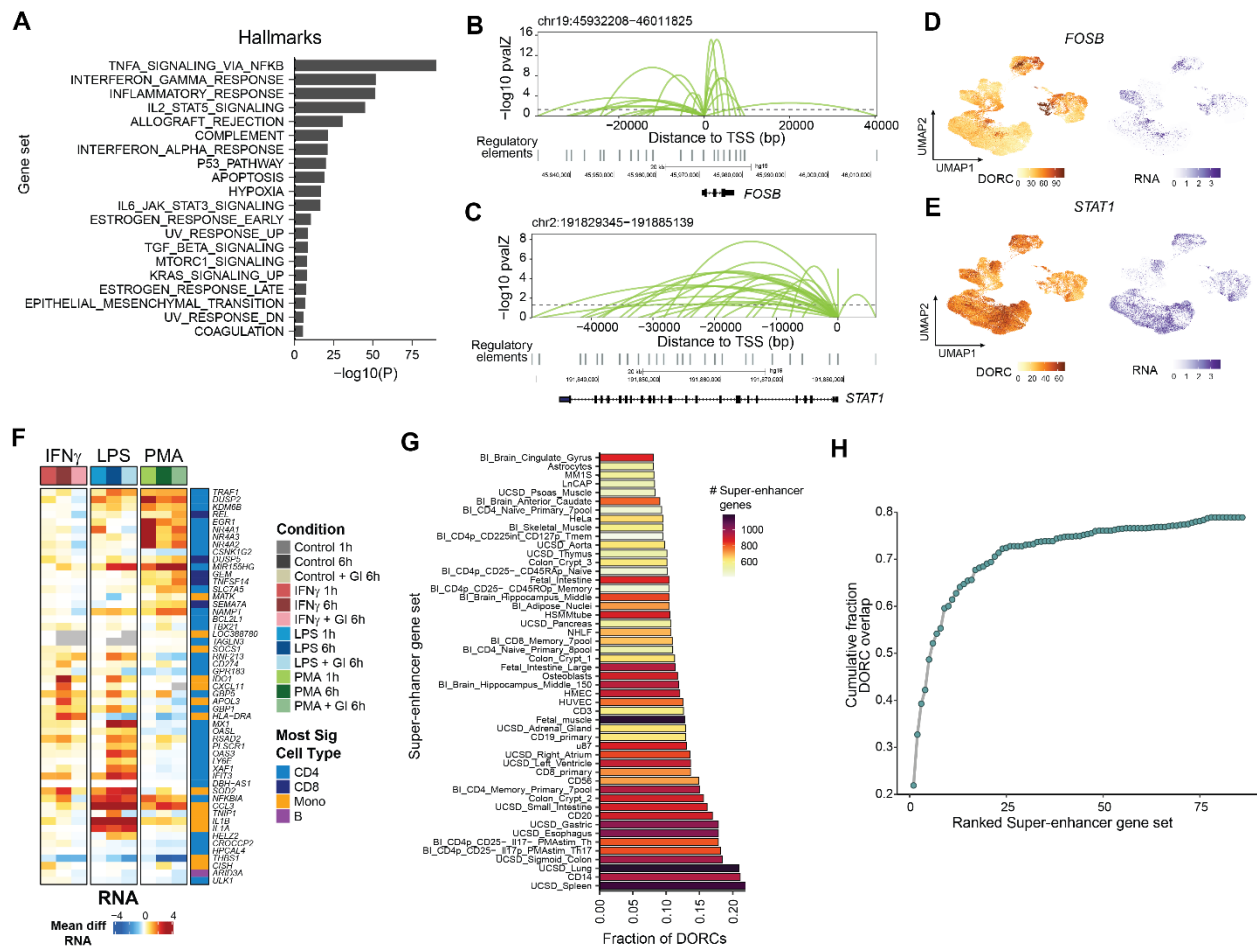

**Fig S4.** Peak-gene associations determine domains of regulatory chromatin associated with stimulus response (related to Figure 3). **A.** Gene set hyper-enrichment testing among DORCs for Hallmark gene sets ( $n=50$ ). **B-C.** Loop plots highlighting significant gene-peak associations for *FOSB* (B) and *STAT1* (C). **D-E.** UMAPs of paired cells ( $n=62,219$ ) highlighting scATAC DORC scores (left) or scRNA expression (right) for *FOSB* (D) and *STAT1* (E). **F.** Heatmap of the mean difference in single cell RNA expression for the union of the top 10 differential DORCs across conditions and cell types ( $n=53$  genes; see Fig 3G). Cell type color bar represents the cell group having the most significant change across all conditions, for that assay. Gray indicates undetected RNA for that condition. **G.** Fraction of DORC genes ( $n=1,128$ ) overlapping genes previously linked to super-enhancer regions under different cellular contexts ( $n=86$ ). Only the top 50 gene sets are shown. **H.** Cumulative fraction of super-enhancer associated genes overlapping DORC genes with the addition of each cellular context

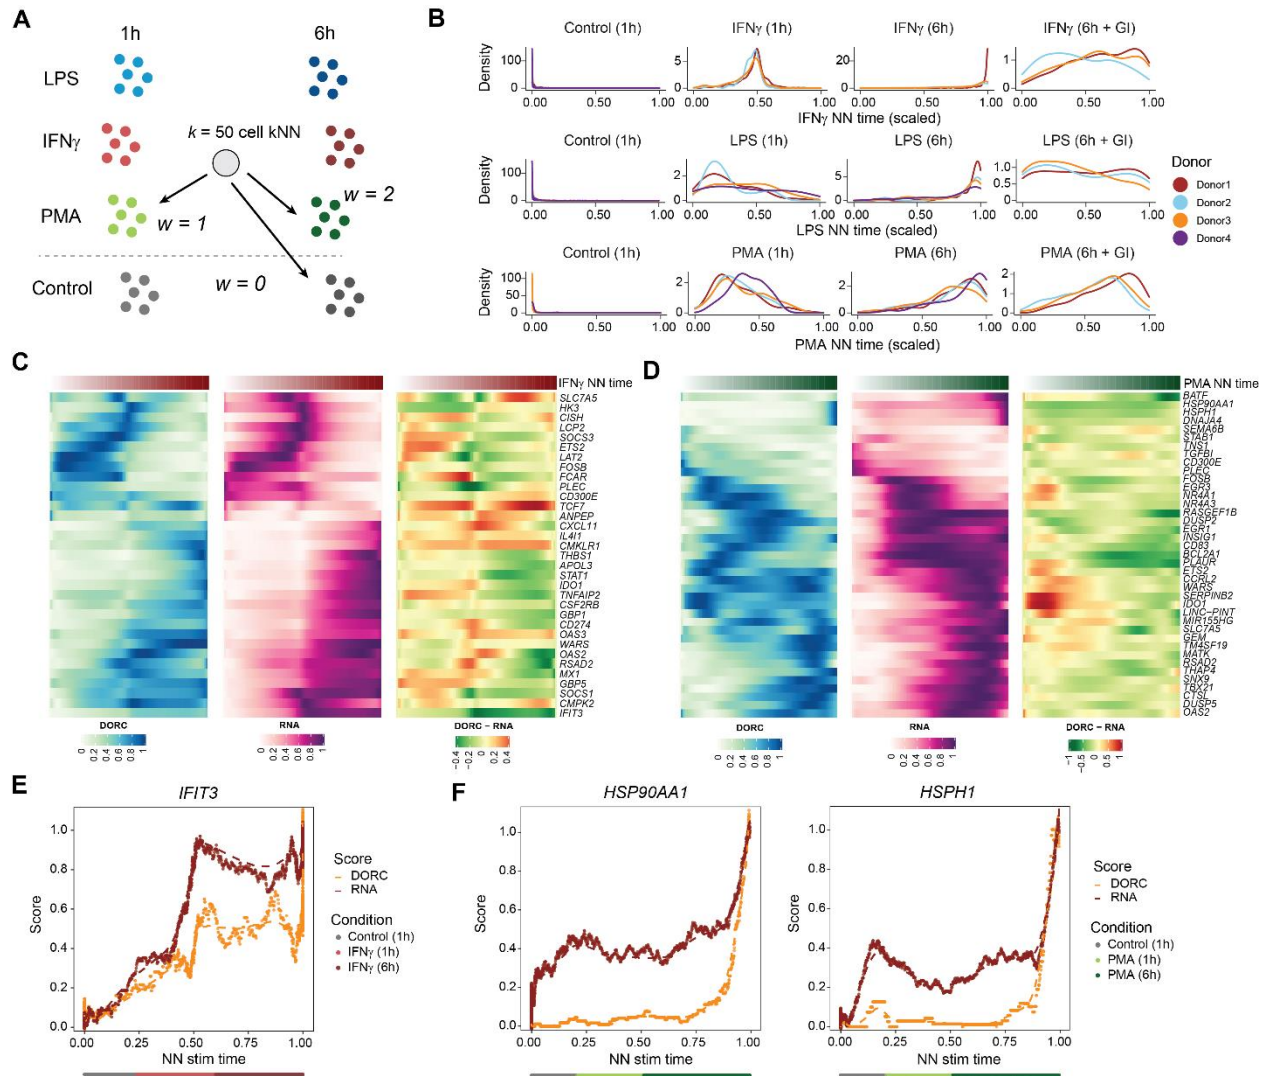

**Figure S5.** Stimulation nearest-neighbor (NN) time determination and DORC features associated with IFN $\gamma$  and PMA NN time in monocytes (related to Figure 4). **A.** Schematic of stimulation nearest neighbor (NN) stimulation time estimation using the weighted average of cell k-nearest neighbors (kNN), per condition. **B.** Cell density distributions of NN stimulation time shown for scATAC monocytes. **C.** Heatmaps highlighting smoothed normalized DORC accessibility, RNA expression and residual (DORC - RNA) levels for DORC genes with respect to IFN $\gamma$  NN stimulation time for Control 1h and IFN $\gamma$  1h/6h monocyte cells (related to Fig 4C). **D.** Same as in C., but for PMA NN stimulation time-associated DORCs in monocytes. **E.** Same as in Fig 4D, but for IFN $\gamma$  NN stimulation time in monocytes. **F.** Same as in E., but for heat shock protein encoding genes *HSP90AA1* and *HSPH1* with respect to PMA NN stim time.





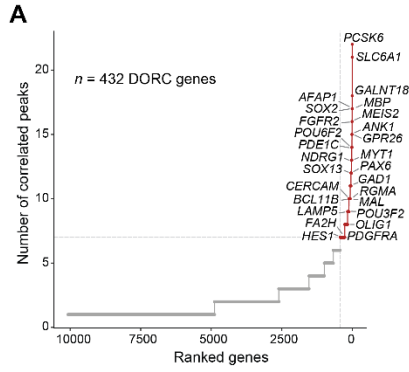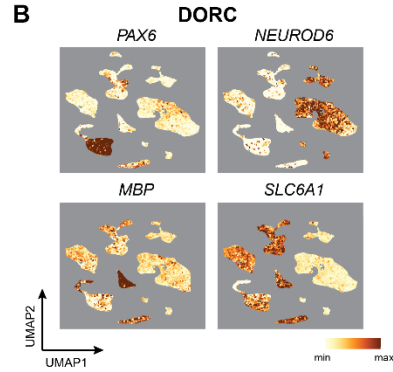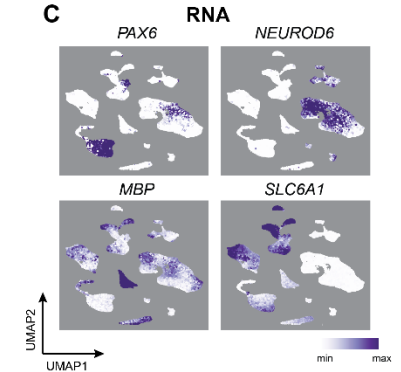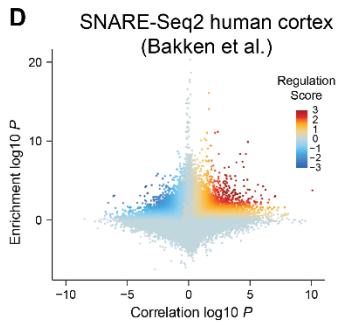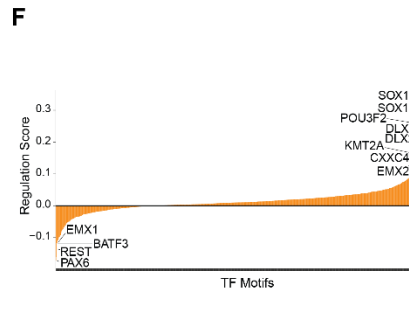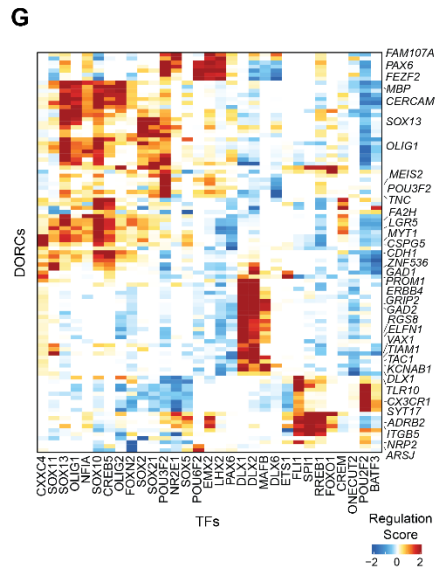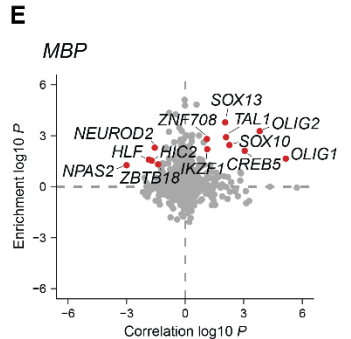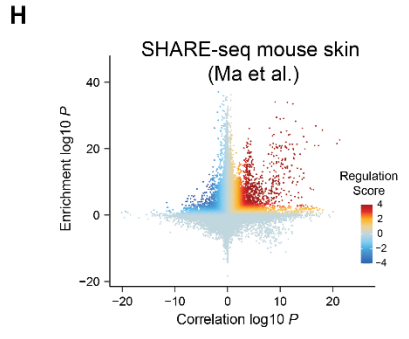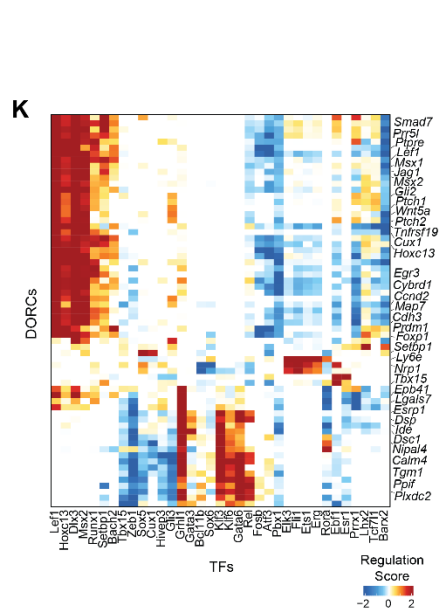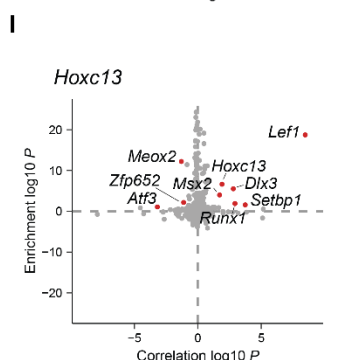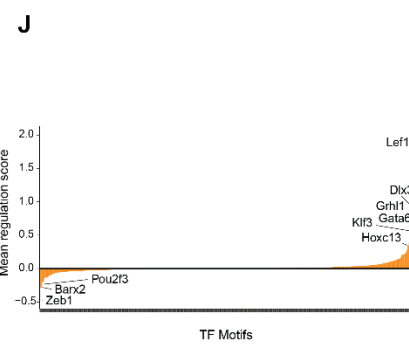

**Figure S7.** FigR GRN application to human cortex and mouse skin multi-omic data (related to Figure 5). **A.** Scatter plot highlighting the number of significant peak-gene associations (permutation  $P \leq 0.05$ ) determined for human cortex cells profiled using SNARE-Seq2 (Bakken et al.[1]). Select DORCs are highlighted among all detected DORCs ( $n=432$  DORCs with  $\geq 7$  peaks; red points). **B-C.** UMAP of human cortex cells (Fig S3H) with cells colored by DORC accessibility scores (**B**) or RNA expression (**C**) shown for *PAX6*, *NEUROD6*, *MBP* and *SLC6A1*. **D.** Scatter plot showing TF-DORC associations based on TF motif enrichment among DORC peaks, and TF RNA correlation to DORC accessibility, respectively, colored by FigR's regulation score. **E.** Same as in D., but restricted for putative TF drivers (absolute(regulation score)  $\geq 1$ ) of *MBP* (red points). **F.** Ranked plot of the mean regulation score across all DORCs per TF (similar to Fig 5E), highlighting top activating and repressive TFs across all DORCs determined for human cortex cells. **G.** Heatmap of regulation scores between filtered TFs and DORCs (absolute(regulation score)  $\geq 2.5$ ; similar to Fig 5F) determined for human cortex cells. **H.** Same as in D, but run using mouse skin SHARE-seq data (Ma et al.[2]). **I.** Same as in H, but restricted for putative TF drivers (absolute (regulation score)  $\geq 1$ ) of DORC *Hoxc13*. **J.** Same as in F, but corresponding to associations shown in H for mouse skin. **K.** Heatmap of regulation scores between top TFs and a filtered subset of previously determined DORCs ( $\log_{10}$  absolute(regulation score)  $\geq 2$ ) for mouse skin SHARE-seq data.

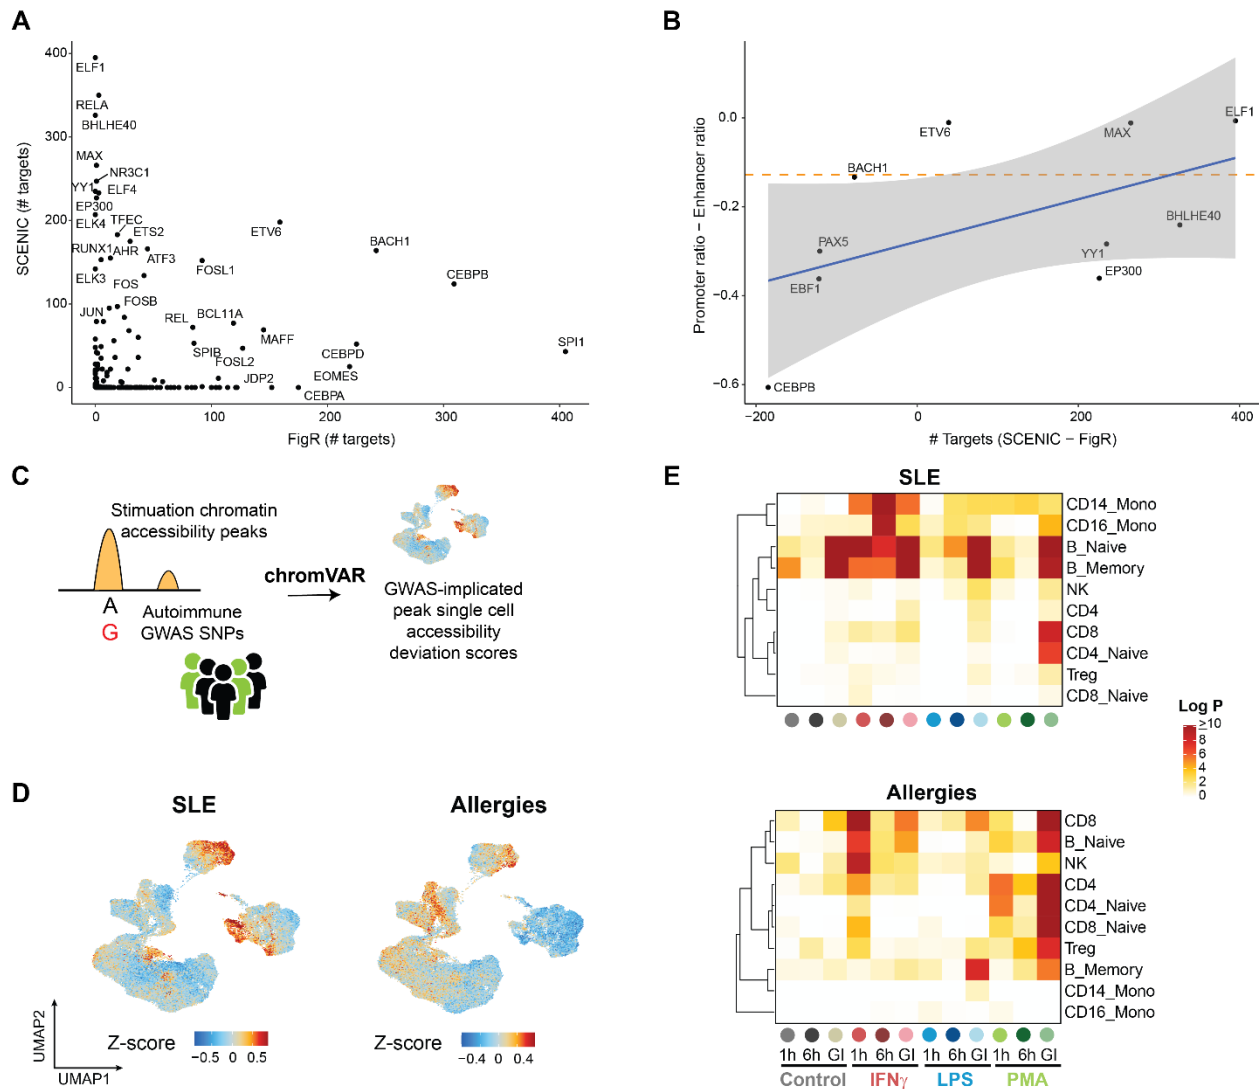

**Figure S8.** Comparison of FigR and SCENIC and interrogation of GWAS-variant linked accessible elements across single cells and stimulus conditions (related to Figure 5). **A.** FigR and SCENIC comparison. Scatter plot of the total number of targets associated with TFs determined using SCENIC's co-expression framework (y-axis) versus FigR's approach (x-axis) using PBMC stimulation data. **B.** Scatter plot of the top SCENIC or top FigR TFs from A ( $n=5$  each) that also have TF CHIP-seq data (ENCODE GM12878), plotting the difference between the fraction of CHIP-seq-determined binding sites that fall in promoter elements and the fraction that overlaps distal enhancer elements (y-axis), versus the total number of inferred target genes in SCENIC minus that in FigR (x-axis). Dotted line represents the mean (expected) difference in promoter ratio and enhancer ratio determined across all TFs with CHIP-seq data ( $n=84$ ). Gray shading represents the 95% confidence interval of the linear fit. **C.** Overview of our approach to integrate GWAS variants for 14 autoimmune/inflammatory diseases with stimulation scATAC-seq data. **D.** UMAP of scATAC-seq cells ( $n=62,219$ ) colored by accessibility Z-scores based on peak-SNP overlaps for Systemic Lupus Erythematosus (SLE) and Allergies GWAS variants. Scores shown are smoothed among  $k=50$  cell nearest neighbors, and thresholded at  $\pm 3$  s.d. for visualization.

E. Heatmap of significance estimates for peak-SNP overlap Z-score combined per condition and per cell type using Fisher's method, shown for SLE and Allergies GWAS variants.

### Supplemental References

- [1] T. E. Bakken *et al.*, "Comparative cellular analysis of motor cortex in human, marmoset and mouse," *Nature*, vol. 598, no. 7879, pp. 111–119, Oct. 2021.
- [2] S. Ma *et al.*, "Chromatin Potential Identified by Shared Single-Cell Profiling of RNA and Chromatin," *Cell*, vol. 183, no. 4, pp. 1103–1116.e20, Nov. 2020.
